# Supplementary material
Source: HighWire-hosted journal article supplement (https://bmjopengastro.bmj.com/highwire/filestream/3496/field_highwire_adjunct_files/0/bmjgast-2022-001008supp001_data_supplement.pdf)
Supplement: bmjgast-2022-001008supp001_data_supplement.pdf [file bmjgast-2022-001008supp001_data_supplement.pdf]

## Supplementary Materials

**Table 1.** Breakdown of acute alternative causes for anaemia, haemodynamic instability or urea rise

|                            | Cause                                          | Derivation cohort | Validation cohort |
|----------------------------|------------------------------------------------|-------------------|-------------------|
| Renal disease              | Acute kidney injury                            | 3                 | 7                 |
|                            | Chronic kidney disease                         | 1                 | 22                |
| Respiratory disease        | Hospital acquired pneumonia                    | 1                 | 3                 |
|                            | Community acquired pneumonia                   | 3                 | 4                 |
|                            | Aspiration pneumonia                           | 3                 | 2                 |
|                            | Lower respiratory tract infection              | 4                 | 4                 |
|                            | Infective exacerbation of asthma               | 1                 | 1                 |
| Cardiac / Vascular disease | Decompensated heart failure                    |                   | 2                 |
|                            | Aortic stenosis                                | 1                 |                   |
|                            | Myocardial infarction/Acute coronary syndromes | 4                 | 1                 |
|                            | Limb ischaemia                                 |                   | 1                 |
| Gastrointestinal disease   | Diarrhoea / obstruction                        | 6                 | 7                 |
|                            | Perforation at gastro-jejunum anastomosis      |                   | 1                 |
| Infection                  | Infection                                      | 17                | 11                |
| Sepsis                     | Sepsis                                         | 10                | 29                |
| Haematological disease     | Haemophilia / von willebrand disease           |                   | 1                 |
|                            | Thalassaemia                                   |                   | 1                 |
|                            | Iron deficiency anaemia                        |                   | 1                 |
|                            | Chronic anaemia                                |                   | 13                |
| Malignancy                 | Cancer                                         | 5                 | 24                |
| Post-op                    | Post-op                                        |                   | 6                 |
| Liver failure              | Liver failure                                  |                   | 1                 |

|              |                                           |   |   |
|--------------|-------------------------------------------|---|---|
| Hypovolaemia | Other causes of bleeding (e.g. epistaxis) | 4 | 7 |
|              | Dehydration                               | 1 | 3 |
|              | Alcohol excess                            | 3 | 6 |
|              | Hydroxycarbamide                          |   | 1 |

**Table 2.** The Glasgow-Blatchford Score

| Score component value                 |   |
|---------------------------------------|---|
| <b>Blood urea (mmol/L)</b>            |   |
| 6.5-7.9                               | 2 |
| 8.0-9.9                               | 3 |
| 10.0-25.0                             | 4 |
| >25.0                                 | 6 |
| <b>Haemoglobin for men (g/L)</b>      |   |
| 120-129                               | 1 |
| 100-119                               | 3 |
| <100                                  | 6 |
| <b>Haemoglobin for women (g/L)</b>    |   |
| 100-119                               | 1 |
| <100                                  | 6 |
| <b>Systolic blood pressure (mmHg)</b> |   |
| 100-109                               | 1 |
| 90-99                                 | 2 |
| <90                                   | 3 |
| <b>Other markers</b>                  |   |
| Pulse $\geq$ 100/min                  | 1 |
| Presentation with melaena             | 1 |
| Presentation with syncope             | 2 |
| Hepatic disease                       | 2 |
| Cardiac failure                       | 2 |

Table 3 Univariable analysis of predictors of need for haemostasis

| Variable                                | Haemostasis not required, Number (%) | Haemostasis required, Number (%) | P value on univariable analysis* |
|-----------------------------------------|--------------------------------------|----------------------------------|----------------------------------|
| Heart rate <100                         | 214 (78)                             | 62 (22)                          |                                  |
| Heart rate >100                         | 99 (64)                              | 56(36)                           | <0.05                            |
| Systolic Blood Pressure >100Hypotensive | 278 (75)                             | 95 (25)                          |                                  |
| Systolic Blood Pressure <100            | 35 (60)                              | 23 (40)                          | <0.05                            |
| Shock index <0.8                        | 199 (78)                             | 57 (22)                          |                                  |
| Shock index >0.8                        | 144 (36)                             | 61 (52)                          | <0.05                            |
| Urea (<7.8mmol/L)                       | 143 (78)                             | 41 (22)                          |                                  |
| Urea (>7.8mmol/L)                       | 170 (69)                             | 77 (31)                          | <0.05                            |
| Creatinine (<125µmol/L)                 | 252 (70)                             | 106 (30)                         |                                  |
| Creatinine (>125µmol/L)                 | 61 (84)                              | 12 (16)                          | 0.37                             |
| Urea/creatinine ratio <100              | 183 (84)                             | 35 (16)                          |                                  |
| Urea/creatinine ratio >100              | 130(61)                              | 83 (39)                          | <0.05                            |
| Haemoglobin (>125 g/L)                  | 117 (89)                             | 15 (11)                          |                                  |
| Haemoglobin (100-125g/L)                | 91 (76)                              | 28 (24)                          |                                  |
| Haemoglobin (<100 g/L)                  | 105 (58)                             | 75 (42)                          | <0.05                            |
| CRP <50mg/ml                            | 213 (68)                             | 99 (32)                          |                                  |
| CRP (>50mg/ml)                          | 100 (84)                             | 19 (16)                          | <0.05                            |
| White cell count <10                    | 159 (72)                             | 63 (28)                          |                                  |
| White cell count >10                    | 154 (74)                             | 55 (26)                          | 0.63                             |
| No Hepatic disease                      | 262(78)                              | 74(22)                           |                                  |
| Hepatic disease                         | 51(54)                               | 44(46)                           | <0.05                            |
| Low Albumin >30                         | 251(79)                              | 67(21)                           |                                  |
| Albumin <30                             | 62(55)                               | 51(55)                           | <0.05                            |
| Prothrombin time <50                    | 273 (71)                             | 110 (29)                         |                                  |
| Prothrombin time >50                    | 40 (83)                              | 8 (17)                           | 0.07                             |
| No Diabetes                             | 254 (72)                             | 99(28)                           |                                  |
| Diabetes                                | 59 (76)                              | 19 (24)                          | 0.50                             |
| No Dementia                             | 295(72)                              | 117 (28)                         |                                  |
| Dementia                                | 18 (95)                              | 1(5)                             | <0.05                            |
| No Stroke                               | 292 (72)                             | 116(28)                          |                                  |
| Stroke                                  | 21 (91)                              | 2 (9)                            | <0.05                            |
| No COPD                                 | 289(72)                              | 115(28)                          |                                  |
| COPD                                    | 24(89)                               | 3(11)                            | 0.05                             |
| No Cancer                               | 303(73)                              | 112(27)                          |                                  |
| Cancer                                  | 10(63)                               | 6(38)                            | 0.35                             |
| Negative findings on DRE                | 173 (78)                             | 50 (22)                          |                                  |
| Positive findings on DRE                | 63(62)                               | 39(38)                           | <0.05                            |
| No SyncopeCardiac failure               | 286 (74)                             | 99 (26)                          |                                  |
| Syncope                                 | 27(59)                               | 19 (41)                          | <0.05                            |

|                                                            |                          |                         |                          |
|------------------------------------------------------------|--------------------------|-------------------------|--------------------------|
| <a href="#">Age&lt; 75</a>                                 | <a href="#">186(68)</a>  | <a href="#">86 (32)</a> |                          |
| <a href="#">Age&gt; 75</a>                                 | <a href="#">127(80)</a>  | <a href="#">32(20)</a>  | <a href="#">&lt;0.05</a> |
| <a href="#">Not on anticoagulants</a>                      | <a href="#">227(70)</a>  | <a href="#">97 (30)</a> |                          |
| <a href="#">On anticoagulants</a>                          | <a href="#">86 (80)</a>  | <a href="#">21(20)</a>  | <a href="#">&lt;0.05</a> |
| <a href="#">Female</a>                                     | <a href="#">122 (75)</a> | <a href="#">40 (25)</a> |                          |
| <a href="#">Male</a>                                       | <a href="#">191 (71)</a> | <a href="#">78 (29)</a> | <a href="#">0.33</a>     |
| <a href="#">No Alternate diagnosis explaining symptoms</a> | <a href="#">231 (68)</a> | <a href="#">111(32)</a> |                          |
| <a href="#">Alternate diagnosis explaining symptoms</a>    | <a href="#">82(92)</a>   | <a href="#">7(8)</a>    | <a href="#">&lt;0.05</a> |

[\\*Chi squared test used to compare proportions](#)
